# Supplementary material for: Store depletion induces Gαq-mediated PLCβ1 activity to stimulate TRPC1 channels in vascular smooth muscle cells
Source: PubMed Central journal article supplement (PMC4714548; doi:10.1096/fj.15-280271), 2015-10-14
Supplement: supp_fj.15-280271_Supplemental_Figures1.pdf [file supp_fj.15-280271_Supplemental_Figures1.pdf]

Supplementary Figure 1

Freshly dispersed rabbit portal vein VSMCs

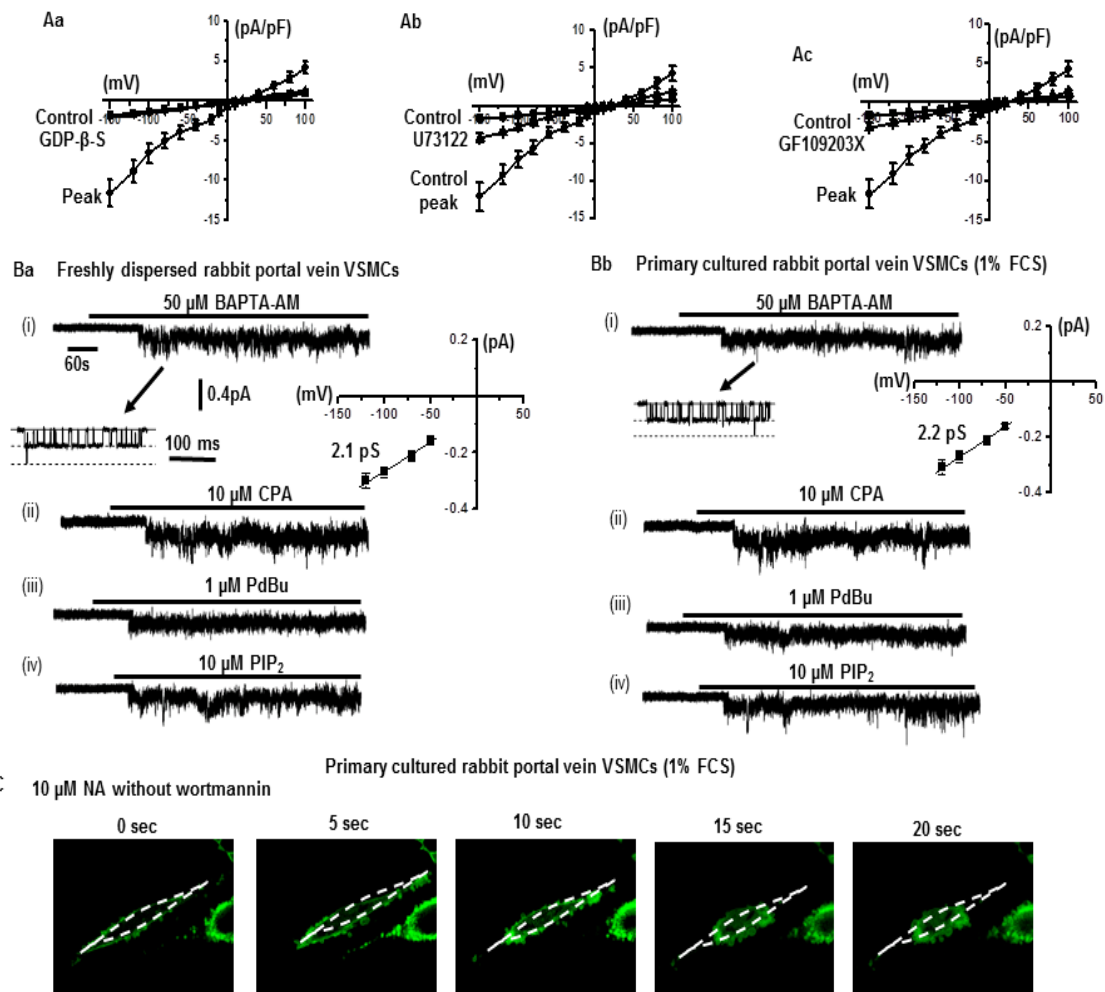

**Figure S1.** (Aa) Inclusion of 500 GDP- $\beta$ -S in the patch pipette solution, or bath applications of (Ab) 2  $\mu$ M U73122, and (Ac) 3  $\mu$ M GF109203X inhibited store-operated whole-cell TRPC1 currents at all membrane tested (each point is from at least  $n=6$ ). Note that peak whole-cell TRPC1 currents had relatively linear I/V relationships with  $E_{rev}$  of about +20 mV. (Ba) and (Bb) Bath applications of BAPTA-AM (i), CPA (ii), and PdBu (iii) activated single channel currents in cell attached patches held at -80 mV from freshly dispersed and primary cultured rabbit portal vein VSMCs. Insets of top traces show that BAPTA-AM-evoked single channel activities had unitary conductances of about 2 pS between -50 mV and -120 mV in both cell preparations. Bath application of the water-soluble PIP<sub>2</sub> analogue, diC8-PIP<sub>2</sub> (iv), to the cytosolic surface of inside-out patches held at -80 mV also evoked similar single channel activities. (C) Time course images showing that application of noradrenaline (NA) in a wortmannin-free bathing solution induced contraction of single VSMCs expressing GFP-PLC $\delta$ -PH within 20 s. The white dotted line outlines the plasma membrane of the resting cell, which enables the noradrenaline-evoked contraction to be clearly visualised. In these cells, noradrenaline induced translocation of GFP-PLC $\delta$ -PH signals from the plasma membrane to the cytosol although accurate imaging of this translocation was precluded by the cell contracting.
