# Supplementary material for: Store depletion induces Gαq-mediated PLCβ1 activity to stimulate TRPC1 channels in vascular smooth muscle cells
Source: PubMed Central journal article supplement (PMC4714548; doi:10.1096/fj.15-280271), 2015-10-14
Supplement: supp_fj.15-280271_Supplemental_Figures2.pdf [file supp_fj.15-280271_Supplemental_Figures2.pdf]

Supplementary Figure 2

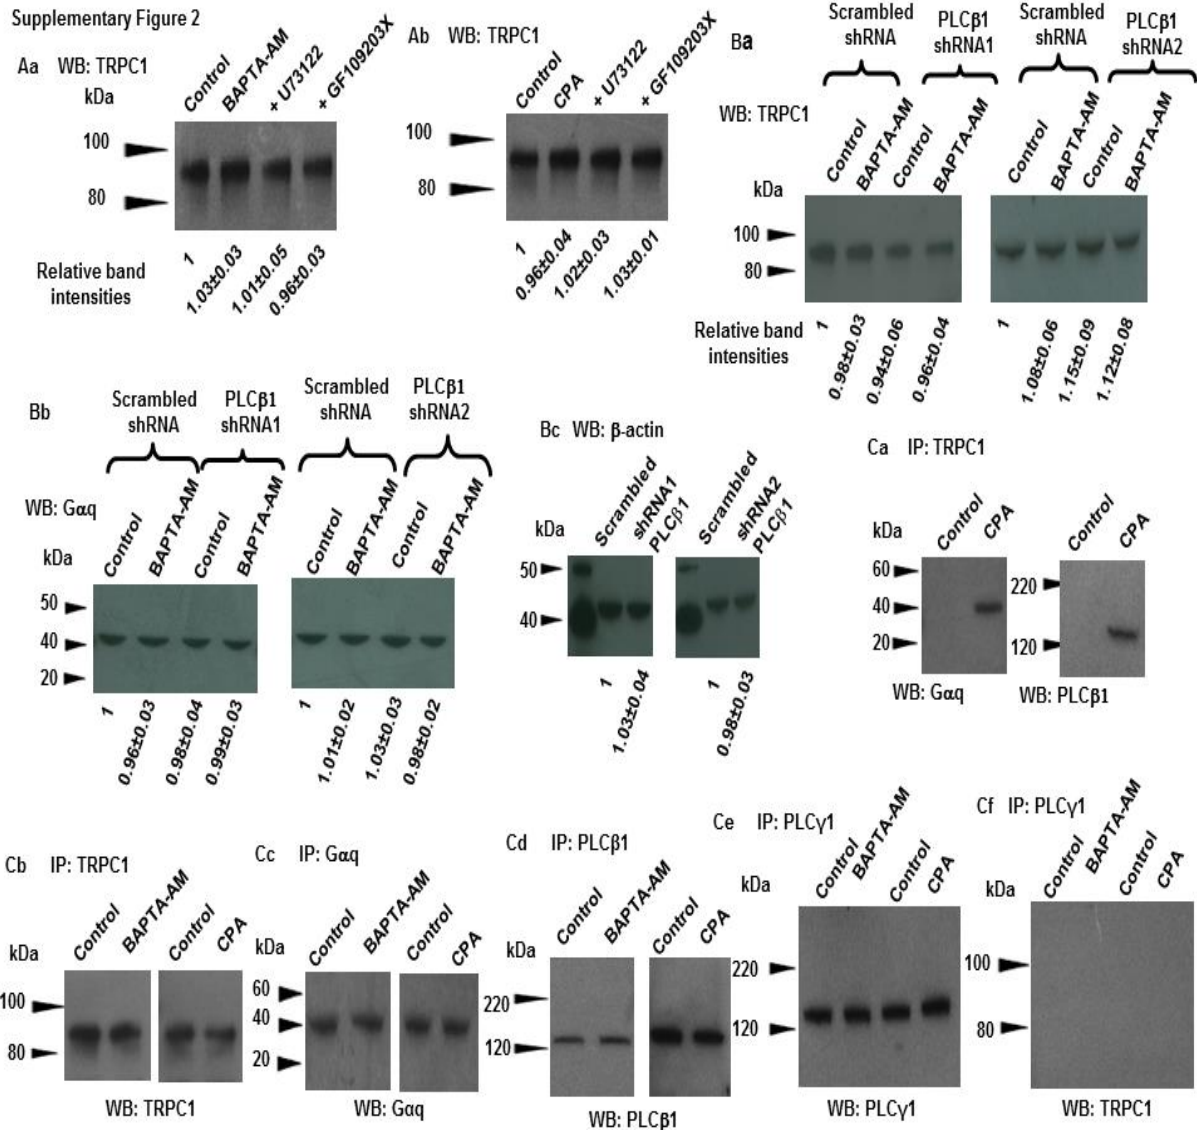

**Figure S2.** (Aa) and (Ab) Western blots showing that pre-treatment with BAPTA-AM or CPA alone, and co-application of U73122 or GF109203X did not change expression levels of TRPC1 proteins. Relative mean band intensities against control values are shown underneath blots (n=3 freshly isolated tissue lysates). (Ba) Western blots showing that scrambled shRNA, and PLCβ1 shRNA1 and shRNA2 sequences had no effect on expression of TRPC1 proteins (n=3 primary cultured cell lysates). (Bb) and (Bc) Western blots showing that PLCβ1 shRNA1 and shRNA2 sequences do not alter Gαq and β-actin expression levels (n=3 primary cultured cell preparations). (Ca) Co-immunoprecipitation with anti-TRPC1 antibodies followed by Western blotting with anti-Gαq or anti-PLCβ1 antibodies show that pre-treatment of vessel segments with CPA induced interactions between TRPC1 and these molecules. (Cb) to (Cd) Pre-treatment of vessels with BAPTA-AM or CPA did not alter expression levels of TRPC1, Gαq, and PLCβ1. (Ce) and (Cf) Pre-treatment with BAPTA-AM or CPA also had no effect on expression levels of PLCγ1 and co-immunoprecipitation with anti-PLCγ1 antibodies followed by Western blotting with anti-TRPC1 antibodies showed no interactions between these two molecules at rest or following pre-treatment with BAPTA-AM or CPA.
