# Supplementary material for: Store depletion induces Gαq-mediated PLCβ1 activity to stimulate TRPC1 channels in vascular smooth muscle cells
Source: PubMed Central journal article supplement (PMC4714548; doi:10.1096/fj.15-280271), 2015-10-14
Supplement: supp_fj.15-280271_Supplemental_Figures4.pdf [file supp_fj.15-280271_Supplemental_Figures4.pdf]

Supplementary Figure 4

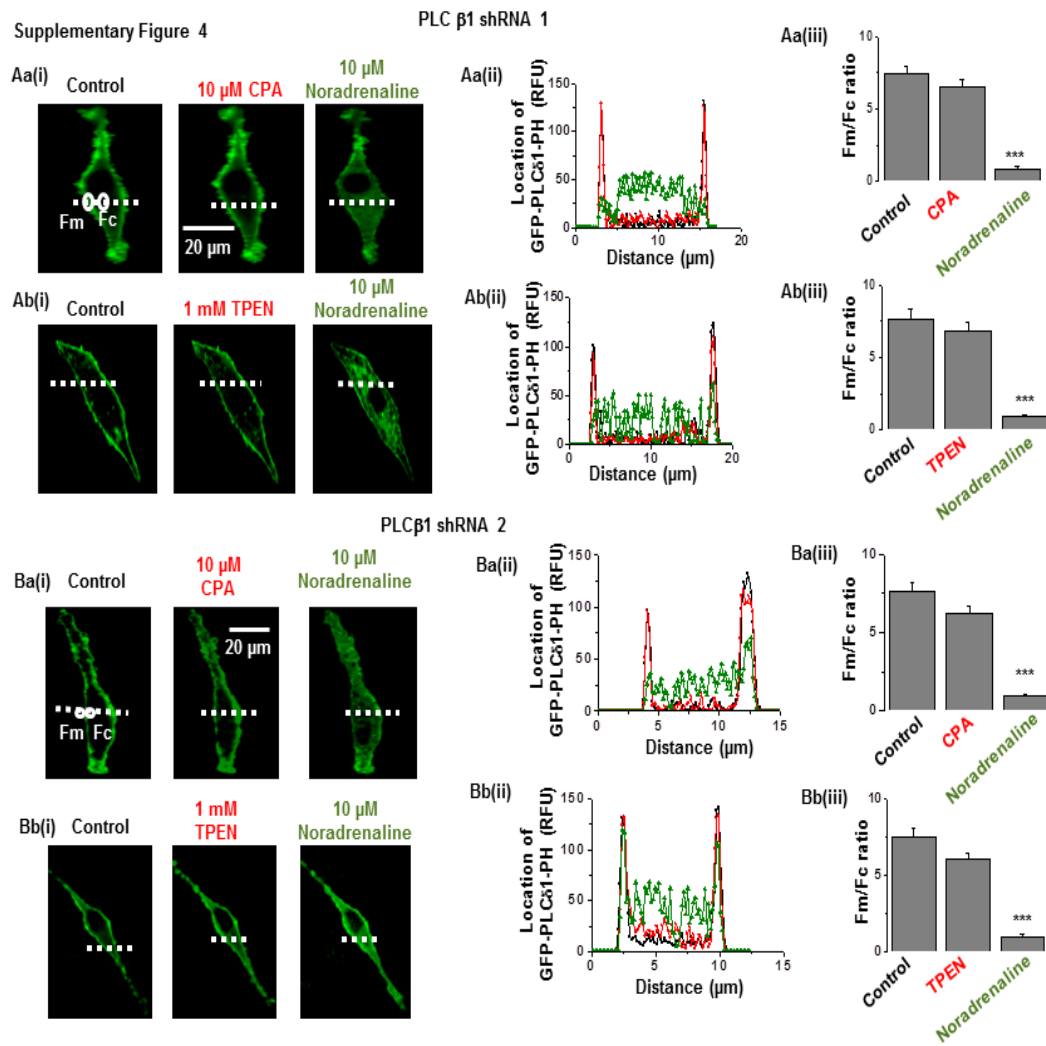

**Figure S4.** (Aa) and (Ab) Representative images showing that BAPTA-AM and TPEN failed to induce translocation of GFP-PLC $\delta$ 1-PH signals to the cytosol (red) following transduction of VSMCs with PLC $\beta$ 1 shRNA1. Noradrenaline (green) was still able to induce translocation of GFP-PLC $\delta$ 1-PH signals from the plasma membrane to the cytosol in the presence of PLC $\beta$ 1 shRNA1. Mean data from n=20 cells from three primary cell culture preparations for CPA and TPEN, \*\* $P$ <0.01. (Ba) and (Bb) Representative images showing that BAPTA-AM and TPEN failed to induced translocation of GFP-PLC $\delta$ 1-PH signals to the cytosol (red) following transduction of VSMCs with PLC $\beta$ 1 shRNA2. Noradrenaline (green) was still able to induce translocation of GFP-PLC $\delta$ 1-PH signals from the plasma membrane to the cytosol in the presence of PLC $\beta$ 1 shRNA2. Mean data from n=20 cells from three primary cell culture preparations for CPA and TPEN, \*\*\* $P$ <0.01.
